# Supplementary material for: Two rare-earth-based quaternary chalcogenides EuCdGeQ4(Q = S, Se) with strong second-harmonic generation
Source: Royal Society of Chemistry journal article supplement (doi:10.1039/c9dt03755a), 2019-01-01
Supplement: c9dt03755a1.pdf [file c9dt03755a1.pdf]

## **Two rare-earth-based quaternary chalcogenides EuCdGeQ<sub>4</sub> (Q = S, Se) with strong second-harmonic generation**

Wenhao Xing,<sup>[abc]</sup> Naizheng Wang,<sup>[bc]</sup> Yangwu Guo,<sup>[bc]</sup> Zhuang Li,<sup>[bc]</sup> Jian Tang,<sup>[ad]</sup> Kaijin Kang,<sup>[ad]</sup> Wenlong Yin,<sup>\*[ae]</sup> Zheshuai Lin,<sup>[b]</sup> Jiyong Yao,<sup>[b]</sup> and Bin Kang<sup>[ae]</sup>

<sup>a</sup> *Institute of Chemical Materials, China Academy of Engineering Physics, Mianyang 621900, People's Republic of China*

\* *E-mail: [wlyin@caep.cn](mailto:wlyin@caep.cn)*

<sup>b</sup> *China Center for Crystal Research and Development, Key Laboratory of Functional Crystals and Laser Technology, Technical Institute of Physics and Chemistry, Chinese Academy of Sciences, Beijing 100190, People's Republic of China, China.*

<sup>c</sup> *University of Chinese Academy of Sciences, Beijing 100190, People's Republic of China.*

<sup>d</sup> *Physics and Space Science College, China West Normal University, Nanchong 637002, People's Republic of China.*

<sup>e</sup> *Key Laboratory of Science and Technology on High Energy Laser, China Academy of Engineering Physics, Mianyang 621900, People's Republic of China.*

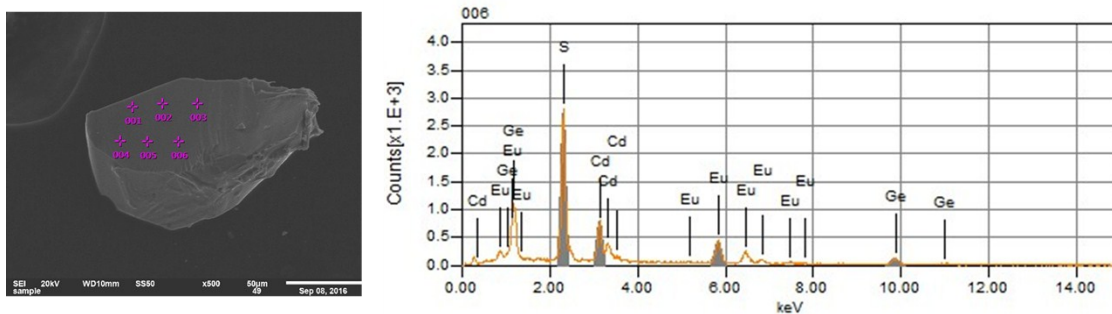

| Number<br>elements | 1 (mol%) | 2(mol%) | 3 (mol%) | 4 (mol%) | 5 (mol%) | 6 (mol%) |
|--------------------|----------|---------|----------|----------|----------|----------|
| Eu                 | 14.50    | 14.44   | 14.20    | 13.78    | 14.72    | 13.83    |
| Cd                 | 14.27    | 14.15   | 14.50    | 14.30    | 14.72    | 14.59    |
| Ge                 | 15.06    | 15.06   | 15.25    | 17.34    | 13.72    | 14.39    |
| S                  | 56.17    | 56.36   | 56.05    | 54.58    | 56.85    | 57.19    |

**Figure S1.** The EDX analysis of  $\text{EuCdGeS}_4$ .

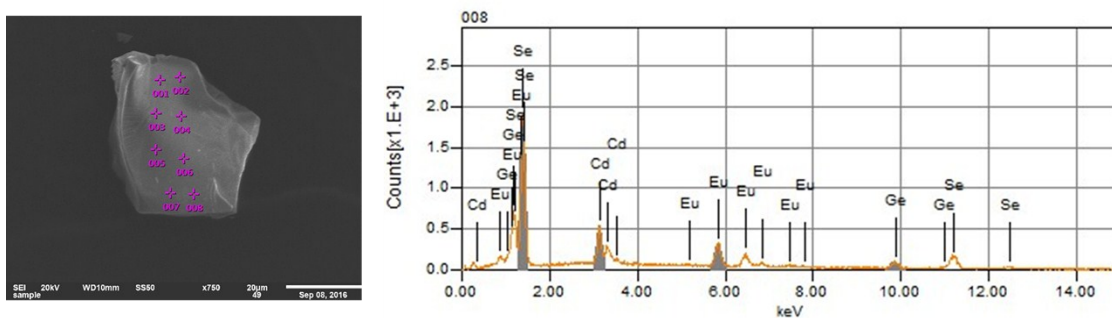

| Number<br>elements | 1 (mol%) | 2(mol%) | 3 (mol%) | 4 (mol%) | 5 (mol%) | 6 (mol%) |
|--------------------|----------|---------|----------|----------|----------|----------|
| Eu                 | 13.83    | 12.57   | 13.26    | 12.32    | 14.33    | 15.27    |
| Cd                 | 14.73    | 14.07   | 14.35    | 14.62    | 14.79    | 14.32    |
| Ge                 | 11.02    | 14.33   | 14.27    | 14.32    | 13.98    | 14.06    |
| Se                 | 60.41    | 60.03   | 58.12    | 58.74    | 56.90    | 56.35    |

**Figure S2.** The EDX analysis of  $\text{EuCdGeSe}_4$ .

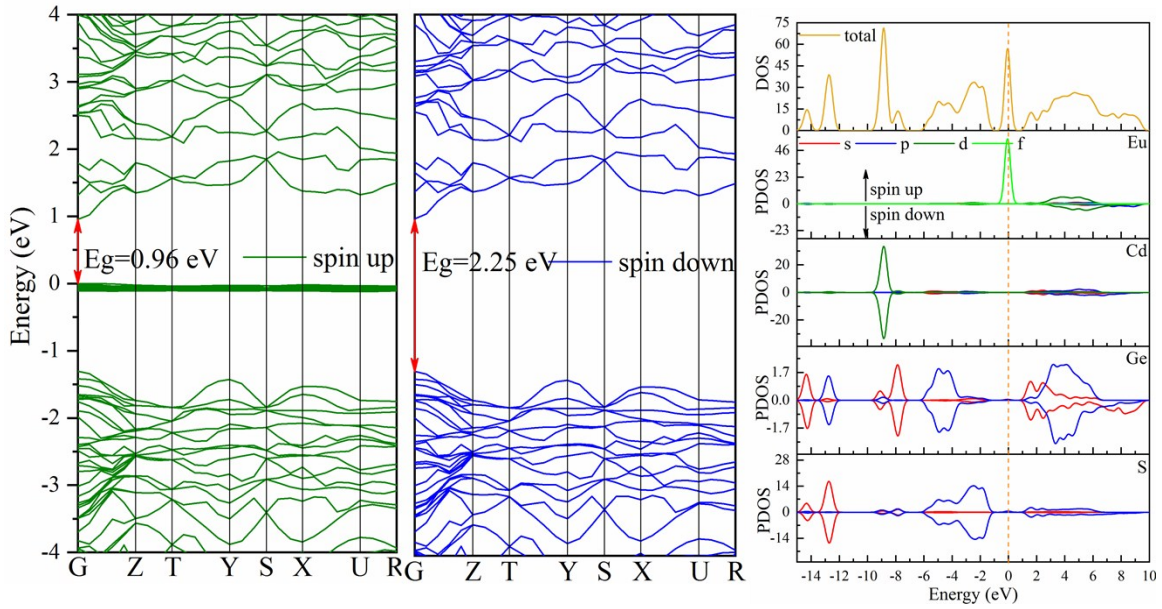

**Figure S3.** The calculated band structure and the density of states (DOS) of  $\text{EuCdGeS}_4$

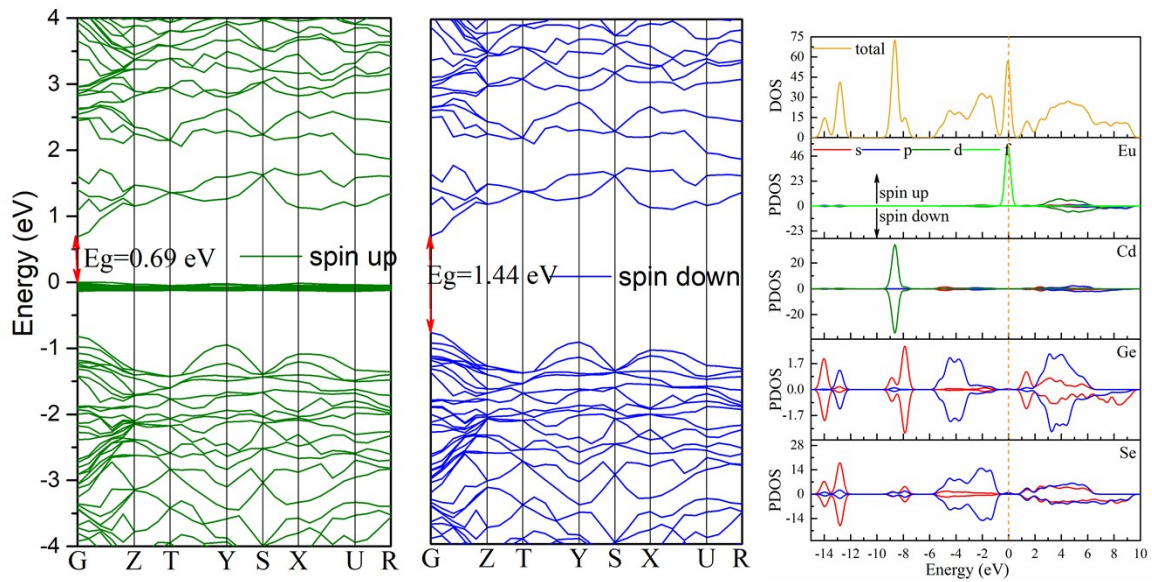

**Figure S4.** The calculated band structure and the density of states (DOS) of  $\text{EuCdGeSe}_4$ .

## Synthesis of EuQ (Q = S, Se)

The binary materials EuQ (Q = S, Se) were synthesized by stoichiometric reactions of the elements within the sealed silica tubes. In the preparation of EuQ (Q = S, Se), the fused-silica tubes were carbon-coated to avoid deleterious reactions with elemental Eu. The tubes were heated to 1273 K for EuS and 1223 K EuSe in 10 h, maintained the temperature for 48 h, and cooling down to room temperature by shutting off the furnace. In order to enhance the crystallinity and purity, regrinding and a repeated heat treatment were necessary for the samples. Eventually, dark powder of EuS and dark red powder of EuSe were obtained. They showed high crystallinity and purity according to the PXRD patterns, which agreed well with patterns simulated from the reported single-crystal structure. [1]

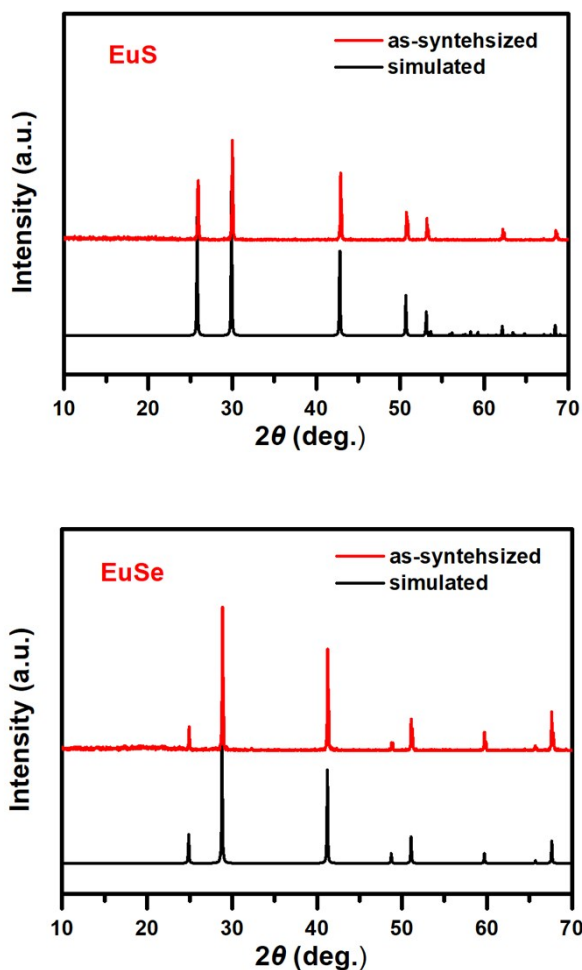

**Figure S5.** Powder XRD patterns of EuQ (Q = S, Se).

**Table S1.** Bond valence sums for  $\text{EuCdGeS}_4$  and  $\text{EuCdGeSe}_4$ .

|                     |      |      |      |      |       |       |
|---------------------|------|------|------|------|-------|-------|
| $\text{EuCdGeS}_4$  | Eu   | Cd   | Ge   | S1   | S2    | S3    |
| BVS                 | 2.01 | 1.96 | 3.97 | 1.87 | 2.071 | 1.933 |
| $\text{EuCdGeSe}_4$ | Eu   | Cd   | Ge   | Se1  | Se2   | Se3   |
| BVS                 | 1.78 | 1.91 | 3.90 | 1.86 | 2.26  | 2.11  |

**Table S4. Space groups and optical performances of  $A^{II}M^{III}M^{IV}Q_4$  ( $A^{II}$  = alkaline-earth metal;  $M^{III}$  = Zn, Cd, Hg, Mn;  $M^{IV}$  = Si, Ge, Sn;  $Q$  = S, Se).**

| Materials                     | Space Group | E <sub>g</sub> (eV) | SHG ( $\times$ AgGaS <sub>2</sub> ) | Phase-matching | congruent-melting | Ref.      |
|-------------------------------|-------------|---------------------|-------------------------------------|----------------|-------------------|-----------|
| BaZnSiSe <sub>4</sub>         | <i>Ama2</i> | 2.71                | 1/3@41-74um                         | -              | -                 | [2]       |
| BaZnGeSe <sub>4</sub>         | <i>Ama2</i> | 2.46                | 1                                   | yes            | -                 | [2]       |
| BaCdSnS <sub>4</sub>          | <i>Fdd2</i> | 2.30                | 0.7                                 | no             | -                 | [3]       |
| BaCdSnSe <sub>4</sub>         | <i>Fdd2</i> | 1.79                | 1.6                                 | no             | -                 | [4]       |
| SrCdGeSe <sub>4</sub>         | <i>Ama2</i> | 2.6                 | 1.7                                 | yes            | 987/946           | [5]       |
| SrCdGeSe <sub>4</sub>         | <i>Ama2</i> | 1.9                 | 5.3                                 | yes            | 885/833           | [5]       |
| SrZnSnS <sub>4</sub>          | <i>Fdd2</i> | 3.37                | 1 $\times$ LiGaS <sub>2</sub>       | yes            | No                | [6]       |
| SrCdSnS <sub>4</sub>          | <i>Fdd2</i> | 2.05                | 1.3                                 | yes            | 889/790           | [7]       |
| SrCdSnSe <sub>4</sub>         | <i>Fdd2</i> | 1.54                | 1.5                                 | yes            | 786/688           | [7]       |
| BaHgGeSe <sub>4</sub>         | <i>Ama2</i> | 2.49                | 4.7                                 | yes            | 732/589           | [8]       |
| SrHgGeSe <sub>4</sub>         | <i>Ama2</i> | 2.42                | 4.8                                 | yes            | 745/684           | [8]       |
| $\beta$ -BaHgSnS <sub>4</sub> | <i>Ama2</i> | 2.77                | 2.8                                 | yes            | no                | [9]       |
| SrHgSnS <sub>4</sub>          | <i>Ama2</i> | 2.72                | 1.9                                 | yes            | no                | [9]       |
| BaHgSnSe <sub>4</sub>         | <i>Fdd2</i> | 1.98                | 5.1                                 | yes            | 712/675           | [9]       |
| SrHgSnSe <sub>4</sub>         | <i>Fdd2</i> | 2.07                | 4.9                                 | yes            | no                | [9]       |
| BaMnSnS <sub>4</sub>          | <i>Fdd2</i> | 1.9                 | 1.2                                 | yes            | 829/636           | [10]      |
| BaCdGeS <sub>4</sub>          | <i>Fdd2</i> | 2.58                | 0.3                                 | yes            | 921/677           | [10]      |
| EuCdGeS <sub>4</sub>          | <i>Ama2</i> | 2.5                 | 2.6                                 | yes            | 997/864           | This work |
| EuCdGeSe <sub>4</sub>         | <i>Ama2</i> | 2.25                | 3.8                                 | yes            | 882/723           | This work |

“-” means no data available.

**Table S3.** Bond lengths for EuCdGeS<sub>4</sub> and EuCdGeSe<sub>4</sub>.

| EuCdGeS <sub>4</sub> |            | EuCdGeSe <sub>4</sub> |            |
|----------------------|------------|-----------------------|------------|
| Bonds                | Length / Å | Bonds                 | Length / Å |
| Eu-S1 (×2)           | 3.1530     | Eu-Se1 (×2)           | 3.2114     |
| Eu-S1 (×2)           | 3.1314     | Eu-Se2 (×2)           | 3.2643     |
| Eu-S2 (×2)           | 3.0106     | Eu-Se2 (×2)           | 3.2605     |
| Eu-S3 (×2)           | 3.1051     | Eu-Se3 (×2)           | 3.1405     |
| Ge-S1 (×2)           | 2.2250     | Ge-Se1                | 2.328      |
| Ge-S2                | 2.240      | Ge-S2 (×2)            | 2.3657     |
| Ge-S3                | 2.191      | Ge-Se3                | 2.379      |
| Cd-S1 (×2)           | 2.5951     | Cd-Se1                | 2.789      |
| Cd-S2                | 2.449      | Cd-Se2 (×2)           | 2.6906     |
| Cd-S3                | 2.670      | Cd-S3                 | 2.5627     |

**Table S4.** Selected bond angles for  $\text{EuCdGeS}_4$  and  $\text{EuCdGeSe}_4$ .

| <b><math>\text{EuCdGeS}_4</math></b>                                                                                                                                                                                                                                                                                                                       |         |                                            |         |
|------------------------------------------------------------------------------------------------------------------------------------------------------------------------------------------------------------------------------------------------------------------------------------------------------------------------------------------------------------|---------|--------------------------------------------|---------|
| Bonds                                                                                                                                                                                                                                                                                                                                                      | Angle / | Bonds                                      | Angle / |
| S1—Eu—S1 <sup>i</sup>                                                                                                                                                                                                                                                                                                                                      | 70.424  | S3 <sup>iv</sup> —Eu—S1 <sup>iii</sup>     | 79.64   |
| S1—Eu—S1 <sup>iii</sup>                                                                                                                                                                                                                                                                                                                                    | 146.82  | S3 <sup>v</sup> —Eu—S1                     | 87.84   |
| S1 <sup>ii</sup> —Eu—S1                                                                                                                                                                                                                                                                                                                                    | 103.38  | S3 <sup>iv</sup> —Eu—S1                    | 33.43   |
| S2—Eu—S1 <sup>i</sup>                                                                                                                                                                                                                                                                                                                                      | 131.74  | S3 <sup>iv</sup> —Eu—S3 <sup>v</sup>       | 116.78  |
| S2 <sup>ii</sup> —Eu—S3 <sup>v</sup>                                                                                                                                                                                                                                                                                                                       | 148.86  | S1 <sup>iii</sup> —Ge—S1 <sup>vii</sup>    | 105.02  |
| S2—Eu—S2 <sup>ii</sup>                                                                                                                                                                                                                                                                                                                                     | 131.44  | S1 <sup>vii</sup> —Ge—S2                   | 105.84  |
| S2—Eu—S1 <sup>iii</sup>                                                                                                                                                                                                                                                                                                                                    | 70.56   | S3—Ge—S1 <sup>iii</sup>                    | 117.12  |
| S2—Eu—S1 <sup>ii</sup>                                                                                                                                                                                                                                                                                                                                     | 74.07   | S3—Ge—S2                                   | 104.85  |
| S2—Eu—S3 <sup>v</sup>                                                                                                                                                                                                                                                                                                                                      | 64.86   | S1 <sup>x</sup> —Cd—S1 <sup>ix</sup>       | 85.74   |
| S1 <sup>i</sup> —Eu—S1 <sup>iii</sup>                                                                                                                                                                                                                                                                                                                      | 132.24  | S1 <sup>ix</sup> —Cd—S3 <sup>xi</sup>      | 93.85   |
| S2 <sup>ii</sup> —Eu—S1 <sup>ii</sup>                                                                                                                                                                                                                                                                                                                      | 76.38   | S2—Cd—S1 <sup>x</sup>                      | 135.12  |
| S3 <sup>iv</sup> —Eu—S1 <sup>i</sup>                                                                                                                                                                                                                                                                                                                       | 75.85   | S2—Cd—S3 <sup>xi</sup>                     | 99.54   |
| Symmetry codes: (i) $-x, -y-1/2, z-1/2$ ; (ii) $-x, -y, z$ ; (iii) $x, y+1/2, z-1/2$ ; (iv) $-x, -y+1/2, z-1/2$ ; (v) $x, y-1/2, z-1/2$ ; (vi) $x, y, z-1$ ; (vii) $-x+1/2, y+1/2, 100 z-1/2$ ; (viii) $x, y, z+1$ ; (ix) $x, y+1/2, z+1/2$ ; (x) $-x+1/2, y+1/2, z+1/2$ ; (xi) $x, y-1/2, z+1/2$ ; (xii) $x+1/2, -y, z$ ; (xiii) $x+1/2, -y+1/2, z+1/2$ . |         |                                            |         |
| <b><math>\text{EuCdGeSe}_4</math></b>                                                                                                                                                                                                                                                                                                                      |         |                                            |         |
| Bonds                                                                                                                                                                                                                                                                                                                                                      | Angle / | Bonds                                      | Angle / |
| Se1 <sup>i</sup> —Eu—Se1                                                                                                                                                                                                                                                                                                                                   | 119.31  | Se3—Eu—Se2                                 | 74.24   |
| Se1—Eu—Se2                                                                                                                                                                                                                                                                                                                                                 | 86.84   | Se3 <sup>i</sup> —Eu—Se2 <sup>iii</sup>    | 72.48   |
| Se1—Eu—Se2 <sup>iii</sup>                                                                                                                                                                                                                                                                                                                                  | 76.73   | Se3 <sup>i</sup> —Eu—Se2 <sup>i</sup>      | 74.25   |
| Se1 <sup>i</sup> —Eu—Se2 <sup>i</sup>                                                                                                                                                                                                                                                                                                                      | 86.84   | Se3—Eu—Se3 <sup>i</sup>                    | 130.13  |
| Se1 <sup>i</sup> —Eu—Se2 <sup>iii</sup>                                                                                                                                                                                                                                                                                                                    | 79.33   | Se1—Ge—Se2 <sup>v</sup>                    | 117.03  |
| Se1—Eu—Se2 <sup>i</sup>                                                                                                                                                                                                                                                                                                                                    | 132.37  | Se1—Ge—Se2 <sup>iv</sup>                   | 117.03  |
| Se2 <sup>iii</sup> —Eu—Se2 <sup>ii</sup>                                                                                                                                                                                                                                                                                                                   | 131.53  | Se1—Ge—Se3 <sup>ii</sup>                   | 104.41  |
| Se2—Eu—Se2 <sup>iii</sup>                                                                                                                                                                                                                                                                                                                                  | 148.17  | Se2 <sup>iv</sup> —Ge—Se2 <sup>v</sup>     | 105.46  |
| Se2—Eu—Se2 <sup>ii</sup>                                                                                                                                                                                                                                                                                                                                   | 69.711  | Se2 <sup>v</sup> —Ge—Se3 <sup>ii</sup>     | 105.94  |
| Se2 <sup>i</sup> —Eu—Se2                                                                                                                                                                                                                                                                                                                                   | 104.46  | Se2 <sup>iii</sup> —Cd—Se1                 | 94.35   |
| Se3—Eu—Se1                                                                                                                                                                                                                                                                                                                                                 | 150.06  | Se2 <sup>xii</sup> —Cd—Se2 <sup>iii</sup>  | 88.80   |
| Se3 <sup>i</sup> —Eu—Se1                                                                                                                                                                                                                                                                                                                                   | 63.85   | Se3 <sup>xiii</sup> —Cd—Se1                | 98.69   |
| Se3—Eu—Se2 <sup>iii</sup>                                                                                                                                                                                                                                                                                                                                  | 130.32  | Se3 <sup>xiii</sup> —Cd—Se2 <sup>iii</sup> | 133.69  |
| Se3 <sup>i</sup> —Eu—Se2                                                                                                                                                                                                                                                                                                                                   | 75.83   |                                            |         |
| Symmetry codes: (i) $-x+1, -y, z$ ; (ii) $-x+1, -y+1/2, z-1/2$ ; (iii) $x, y-1/2, z-1/2$ ; (iv) $x, y, z-1$ ; (v) $-x+3/2, y, z-1$ ; (vi) $x+1/2, -y, z$ ; (vii) $x, y+1/2, z+1/2$ ; (viii) $x, y, z+1$ ; (ix) $x-1/2, -y, z$ ; (x) $-x+1, -y+1/2, z+1/2$ ; (xi) $-x+1, -y, z+1$ ; (xii) $-x+3/2, y-1/2, z-1/2$ ; (xiii) $-x+1, -y, z-1$ .                 |         |                                            |         |



## Reference

1. K.G. Subhadra, B. R. Rao, D.B. Sirdeshmukh, *Pramana - J. Phys.* 1992, 38, 681-683.
2. W. Yin, A. K. Iyer, C. Li, J. Yao, A. Mar, *J. Alloys Compd.*, 2017, 708, 414-421.
3. N. Zhen, K. Wu, Y. Wang, Q. Li, W. Gao, D. Hou, Z. Yang, H. Jiang, Y. Dong, S. Pan, *Dalton Trans.*, 2016, 45, 10681-10688.
4. K. Wu, X. Su, Z. Yang, S. Pan, *Dalton Trans.*, 2015, 44 () 19856-19864.
5. Y. Dou, Y. Chen, Z. Li, A.K. Iyer, B. Kang, W. Yin, J. Yao, A. Mar, *Cryst. Growth Des.*, 2019, 19, 1206-1214.
6. Y. Zhang, D. Mei, Y. Yang, W. Cao, Y. Wu, J. Lu, Z. Lin, *J. Mater. Chem. C*, 2019, 7, 8556-8561.
7. Y.-J. Lin, B.-W. Liu, R. Ye, X.-M. Jiang, L.-Q. Yang, H.-Y. Zeng, G.-C. Guo, *J. Mater. Chem. C*, 2019, 7, 4459-4465.
8. Y. Guo, F. Liang, W. Yin, Z. Li, X. Luo, Z.-S. Lin, J. Yao, A. Mar, Y. Wu, *Chem. Mater.*, 2019, 31, 3034-3040.
9. Y. Guo, F. Liang, Z. Li, W. Xing, Z. Lin, J. Yao, A. Mar, Y. Wu, *Inorg. Chem.*, 2019, 58, 10390-10398.
10. Y. Lin, R. Ye, L. Yang, X. Jiang, B. Liu, H. Zeng, G. Guo, *Inorg. Chem. Front.*, 2019, DOI: 10.1039/C9QI00727J.G.
